# Supplementary material for: Perinatal risk factors for fecal antibiotic resistance gene patterns in pregnant women and their infants
Source: PubMed Central journal article supplement (PMC7302573; doi:10.1371/journal.pone.0234751), 2020-06-18
Supplement: pone.0234751.s005.pdf [file pone.0234751.s005.pdf]

| N ° | Name            | Functional classification | Target antibiotics |
|-----|-----------------|---------------------------|--------------------|
| 1   | aacA/aphD       | deactivate                | Aminoglycoside     |
| 2   | aphA3           | deactivate                | Aminoglycoside     |
| 3   | sat4            | deactivate                | Aminoglycoside     |
| 4   | aph(2')-Id      | deactivate                | Aminoglycoside     |
| 5   | aadE            | deactivate                | Aminoglycoside     |
| 6   | aph4ib          | aph4ib                    | Aminoglycoside     |
| 7   | aph6ic          | aph6ic                    | Aminoglycoside     |
| 8   | spcN            | deactivate                | Aminoglycoside     |
| 9   | aac(3)          | aac(3)                    | Aminoglycoside     |
| 10  | Aac6-Aph2       | Aac6-Aph2                 | Aminoglycoside     |
| 11  | aac(6)-im       | aac(6)-im                 | Aminoglycoside     |
| 12  | aadA7           | aadA7                     | Aminoglycoside     |
| 13  | aadA17          | aadA17                    | Aminoglycoside     |
| 14  | aadB            | aadB                      | Aminoglycoside     |
| 15  | ant6-ia         | ant6-ia                   | Aminoglycoside     |
| 16  | aph3-ib         | aph3-ib                   | Aminoglycoside     |
| 17  | acc3-iva        | deactivate                | Aminoglycoside     |
| 18  | aph6ia          | deactivate                | Aminoglycoside     |
| 19  | aph3-III        | aph3-III                  | Aminoglycoside     |
| 20  | ant6-ib         | aph3-III                  | Aminoglycoside     |
| 21  | aac(3)-Xa       | aac(3)-Xa                 | Aminoglycoside     |
| 22  | blaOXY-2        | deactivate                | Beta-lactamase     |
| 23  | cphA            | deactivate                | Beta-lactamase     |
| 24  | cfxA            | deactivate                | Beta-lactamase     |
| 25  | cepA            | deactivate                | Beta-lactamase     |
| 26  | blaCMY          | deactivate                | Beta-lactamase     |
| 27  | blaSFO          | deactivate                | Beta-lactamase     |
| 28  | Pbp5            | protection                | Beta-lactamase     |
| 29  | blaCTX-M        | deactivate                | Beta-lactamase     |
| 30  | penA            | protection                | Beta-lactamase     |
| 31  | NDM new         | deactivate                | Beta-lactamase     |
| 32  | blaCTX-M-1,3,15 | blaCTX-M-1,3,15           | Beta-lactamase     |
| 33  | blaOXY-1        | deactivate                | Beta-lactamase     |
| 34  | blaMIR          | bla_MIR                   | Beta-lactamase     |
| 35  | ampC            | deactivate                | Beta-lactamase     |
| 36  | blaTEM          | deactivate                | Beta-lactamase     |

|    |                    |           |                 |
|----|--------------------|-----------|-----------------|
| 37 | bla-ACT<br>qnrB-   | bla-ACT   | Beta-lactamase  |
| 38 | bob_redesign       | efflux    | Fluoroquinolone |
| 39 | norA               | norA      | Fluoroquinolone |
| 40 | qepA_1_2           | qepA_1_2  | Fluoroquinolone |
| 41 | oqxA               |           | Fluoroquinolone |
| 42 | acrB               | efflux    | MDR             |
| 43 | acrF               | efflux    | MDR             |
| 44 | emrD               | efflux    | MDR             |
| 45 | mdtE/yhiU          | efflux    | MDR             |
| 46 | mexA               | efflux    | MDR             |
| 47 | oprD               | efflux    | MDR             |
| 48 | mepA               | efflux    | MDR             |
| 49 | mexE               | efflux    | MDR             |
| 50 | tolC               | efflux    | MDR             |
| 51 | merA-marko         | unknown   | MDR             |
| 52 | marR               | regulator | MDR             |
| 53 | mdth               | mdth      | MDR             |
| 54 | mdtg               | mdtg      | MDR             |
| 55 | pcoA               | pcoA      | MDR             |
| 56 | arsA               | arsA      | MDR             |
| 57 | bexA/norM          | efflux    | MDR             |
| 58 | mdtA               | efflux    | MDR             |
| 59 | czcA               | czcA      | MDR             |
| 60 | sugE               | sugE      | MDR             |
| 61 | terW               |           | MDR             |
| 62 | pbrT               |           | MDR             |
| 63 | IS613              | MGE       | MGE             |
| 64 | tnpA               | MGE       | MGE             |
| 65 | tnpA               | MGE       | MGE             |
| 66 | tnpA               | MGE       | MGE             |
| 67 | int1-a-marko       | MGE       | MGE             |
| 68 | int12              | MGE       | MGE             |
| 69 | IncN_rep           | MGE       | MGE             |
| 70 | IncP_oriT          | MGE       | MGE             |
| 71 | int11F165_clinical | MGE       | MGE             |
| 72 | orf39-IS26         | MGE       | MGE             |
| 73 | ISSm2-Xanthob      | MGE       | MGE             |
| 74 | ISEfm1-Enterob     | MGE       | MGE             |
| 75 | IS1111             | MGE       | MGE             |

|     |             |            |              |
|-----|-------------|------------|--------------|
| 76  | intl3       | MGE        | MGE          |
| 77  | ISCR1       |            | MGE          |
| 78  | IS26        | IS26       | MGE          |
| 79  | IS3         | IS3        | MGE          |
| 80  | IS256       | IS256      | MGE          |
| 81  | IS200_1     | IS200_1    | MGE          |
| 82  | IS1247      | IS1247     | MGE          |
| 83  | IS630       | IS630      | MGE          |
| 84  | TN5403      |            | MGE          |
| 85  | IS200       |            | MGE          |
| 86  | IS21-ISAs29 |            | MGE          |
| 87  | Tn3         |            | MGE          |
| 88  | Incl1_repl1 |            | MGE          |
| 89  | IS91        |            | MGE          |
| 90  | erm(36)     | protection | MLSB         |
| 91  | ermT        | protection | MLSB         |
| 92  | msr(C)      | msr(C)     | MLSB         |
| 93  | ermX        | protection | MLSB         |
| 94  | vgaB        | efflux     | MLSB         |
| 95  | pica        | protection | MLSB         |
| 96  | ermA/ermTR  | protection | MLSB         |
| 97  | oleC        | efflux     | MLSB         |
| 98  | ere(A)      | ere(A)     | MLSB         |
| 99  | erm(B)      | erm(B)     | MLSB         |
| 100 | erm(E)      | erm(E)     | MLSB         |
| 101 | erm(Q)      | erm(Q)     | MLSB         |
| 102 | mphA        | deactivate | MLSB         |
| 103 | erm(35)     | erm(35)    | MLSB         |
| 104 | erm(F)      | erm(F)     | MLSB         |
| 105 | lsa(C)      | lsa(C)     | MLSB         |
| 106 | mefA        | efflux     | MLSB         |
| 107 | lnuC        | deactivate | MLSB         |
| 108 | sul2        | protection | Sulfonamide  |
| 109 | strB        | protection | Sulfonamide  |
| 110 | folA        | protection | Sulfonamide  |
| 111 | sulA/foIP   | protection | Sulfonamide  |
| 112 | sul1 NEW    | protection | Sulfonamide  |
| 113 | tet(32)     | protection | Tetracycline |
| 114 | tetA        | efflux     | Tetracycline |
| 115 | tetB        | efflux     | Tetracycline |

|     |        |            |              |
|-----|--------|------------|--------------|
| 116 | tetQ   | protection | Tetracycline |
| 117 | tetW   | protection | Tetracycline |
| 118 | tetX   | deactivate | Tetracycline |
| 119 | tetS   | protection | Tetracycline |
| 120 | tetbP  | efflux     | Tetracycline |
| 121 | tetR   | tetR       | Tetracycline |
| 122 | tetG_F | tetG_F     | Tetracycline |
| 123 | tetPA  | efflux     | Tetracycline |
| 124 | tetM   | protection | Tetracycline |
| 125 | tet44  | tet44      | Tetracycline |
| 126 | VanB   | VanB       | Vancomycin   |
| 127 | vanD   | protection | Vancomycin   |
| 128 | vanHD  | protection | Vancomycin   |
| 129 | vanHB  | protection | Vancomycin   |
| 130 | vanRB  | protection | Vancomycin   |
| 131 | vanRD  | protection | Vancomycin   |
| 132 | vanTG  | protection | Vancomycin   |
| 133 | vanYD  | protection | Vancomycin   |
