# Supplementary material for: Perinatal risk factors for fecal antibiotic resistance gene patterns in pregnant women and their infants
Source: PubMed Central journal article supplement (PMC7302573; doi:10.1371/journal.pone.0234751), 2020-06-18
Supplement: pone.0234751.s006.pdf [file pone.0234751.s006.pdf]

| <b>Pregnancy samples</b> | <b>ARG</b>                       |                       |                    |                |
|--------------------------|----------------------------------|-----------------------|--------------------|----------------|
| <b>Race</b>              | <b>White</b>                     | <b>Non-white</b>      | <b>p-value</b>     |                |
| Sum of abundance         | 0.56 (0.33 - 1.06)               | 2.62 (0.72 - 5.63)    | 0.062†             |                |
| Richness                 | 54 (42 - 60)                     | 30.5 (29.3 - 49)      | 0.193              |                |
| Shannon Index            | 1.8 (1.54 - 2.21)                | 1.36 (1.06 - 1.75)    | 0.099†             |                |
| Inverse Simpson Index    | 4.39 (3.09 - 6.42)               | 2.78 (2.05 - 4.09)    | 0.149              |                |
| <b>Parity</b>            | <b>1-2 children</b>              | <b>&gt;3 children</b> | <b>p-value</b>     |                |
| Sum of abundance         | 0.76 (0.40 - 1.55)               | 0.65 (0.46 - 1.39)    | 0.952              |                |
| Richness                 | 51.5 (32.5 - 58.5)               | 56.5 (53.5 - 61)      | 0.178              |                |
| Shannon Index            | 1.71 (1.28 - 1.99)               | 1.96 (1.75 - 2.23)    | 0.198              |                |
| Inverse Simpson Index    | 3.7 (2.7-5.4)                    | 5.09 (3.68 - 6.91)    | 0.138              |                |
| <b>Smoking</b>           | <b>Never</b>                     | <b>Ever</b>           | <b>p-value</b>     |                |
| Sum of abundance         | 0.56 (0.29 - 1.47)               | 1.05 (0.51 - 1.58)    | 0.313              |                |
| Richness                 | 53 (34.5 - 59)                   | 55 (36.8 - 62.5)      | 0.725              |                |
| Shannon Index            | 1.76 (1.27 - 2.16)               | 1.79 (1.44 - 2.12)    | 0.53               |                |
| Inverse Simpson Index    | 3.46 (2.41 - 5.66)               | 4.35 (3.2 - 6.48)     | 0.234              |                |
| <b>Pre-Pregnancy BMI</b> | <b>Normal or<br/>underweight</b> | <b>Overweight</b>     | <b>Obese</b>       | <b>p-value</b> |
| Sum of abundance         | 0.83 (0.48 - 1.51)               | 0.56 (0.28 - 1.74)    | 0.57 (0.26 - 1.38) | 0.613          |
| Richness                 | 55.5 (41.5 - 63.5)               | 53 (31 - 57)          | 52 (38 - 57.5)     | 0.659          |
| Shannon Index            | 1.85 (1.59 - 2.43)               | 1.65 (1.27 - 2.35)    | 1.67 (1.43 - 1.9)  | 0.311          |
| Inverse Simpson Index    | 4.77 (3.26 - 8.19)               | 3.46 (2.46 - 7.41)    | 3.52 (2.85 - 4.78) | 0.293          |

| <b>Infancy samples</b> | <b>ARG</b>         |                    |                |  |
|------------------------|--------------------|--------------------|----------------|--|
| <b>Sex</b>             | <b>Female</b>      | <b>Male</b>        | <b>p-value</b> |  |
| Sum of abundance       | 0.95 (0.36 - 1.13) | 0.51 (0.34 - 0.79) | 0.252          |  |
| Richness               | 48 (42 - 52)       | 51 (48 - 57.5)     | 0.056†         |  |
| Shannon Index          | 2.21 (1.82 - 2.36) | 2.17 (1.79 - 2.38) | 0.887          |  |
| Inverse Simpson Index  | 6.06 (3.47 - 7.74) | 5.56 (3.9 - 8.48)  | 0.977          |  |
| <b>Delivery mode</b>   | <b>C-section</b>   | <b>Vaginal</b>     | <b>p-value</b> |  |
| Sum of abundance       | 0.47 (0.35 - 0.79) | 0.58 (0.25 - 1.22) | 0.332          |  |
| Richness               | 53 (49.5 - 60)     | 49 (44 - 54)       | 0.059†         |  |
| Shannon Index          | 2.17 (1.91 - 2.45) | 2.2 (1.64 - 2.32)  | 0.761          |  |

|                              |                      |                    |                |
|------------------------------|----------------------|--------------------|----------------|
| Inverse Simpson Index        | 5.14 (4.07 - 8.4)    | 6.06 (3.47 - 7.94) | 0.761          |
| <b>Breastmilk percentage</b> | <b>&lt;50%</b>       | <b>≥50%</b>        | <b>p-value</b> |
| Sum of abundance             | 0.51 (0.41 - 0.79)   | 0.59 (0.21 - 1.13) | 0.719          |
| Richness                     | 49 (45 - 55.5)       | 51 (45 - 57)       | 0.812          |
| Shannon Index                | 2.21 (1.84 - 2.39)   | 2.12 (1.82 - 2.36) | 0.699          |
| Inverse Simpson Index        | 6.06 (4.44 - 8.21)   | 5.97 (3.3 - 7.94)  | 0.741          |
| <b>Diet</b>                  | <b>No solid food</b> | <b>Solid food</b>  | <b>p-value</b> |
| Sum of abundance             | 0.56 (0.40 - 0.84)   | 0.52 (0.27 - 1.01) | 0.635          |
| Richness                     | 58.5 (51.3 - 61)     | 50 (45 - 53)       | 0.107          |
| Shannon Index                | 2.21 (1.73 - 2.47)   | 2.2 (1.76 - 2.35)  | 0.739          |
| Inverse Simpson Index        | 5.92 (3.43 - 8.14)   | 6.19 (3.99 - 8.28) | 0.902          |

† = p values < 0.1)
