# Supplementary material for: Perinatal risk factors for fecal antibiotic resistance gene patterns in pregnant women and their infants
Source: PubMed Central journal article supplement (PMC7302573; doi:10.1371/journal.pone.0234751), 2020-06-18
Supplement: pone.0234751.s007.pdf [file pone.0234751.s007.pdf]

| <b>Pregnancy samples</b> | <b>MGE</b>                       |                                                 |                     |                |
|--------------------------|----------------------------------|-------------------------------------------------|---------------------|----------------|
| <b>Race</b>              | <b>White</b>                     | <b>Non-white</b>                                | <b>p-value</b>      |                |
| Sum of abundance         | 0.09 (0.03 - 0.28)               | $4 \times 10^{-4}$ ( $3 \times 10^{-5}$ - 0.03) | 0.003*              |                |
| Richness                 | 11 (7 - 14)                      | 4 (2.5 - 8.5)                                   | 0.035*              |                |
| Shannon Index            | 0.64 (0.16 - 1.18)               | 0.87 (0.51 - 1.18)                              | 0.909               |                |
| Inverse Simpson Index    | 1.71 (1.06 - 2.77)               | 2.29 (1.38 - 3.05)                              | 0.546               |                |
| <b>Parity</b>            | <b>1-2 children</b>              | <b>&gt;3 children</b>                           | <b>p-value</b>      |                |
| Sum of abundance         | 0.06 (0.0026 - 0.21)             | 0.14 (0.09 - 0.25)                              | 0.074†              |                |
| Richness                 | 9.5 (6 - 13)                     | 11 (9.25 - 15)                                  | 0.185               |                |
| Shannon Index            | 0.72 (0.28 - 1.24)               | 0.26 (0.10 - 1.09)                              | 0.409               |                |
| Inverse Simpson Index    | 1.73 (1.13 - 2.87)               | 1.14 (1.03 - 2.76)                              | 0.382               |                |
| <b>Smoking</b>           | <b>Never</b>                     | <b>Ever</b>                                     | <b>p-value</b>      |                |
| Sum of abundance         | 0.07 (0.02 - 0.22)               | 0.11 (0.007 - 0.29)                             | 0.557               |                |
| Richness                 | 11 (6.5 - 12.5)                  | 10 (5.3 - 13)                                   | 0.936               |                |
| Shannon Index            | 0.68 (0.16 - 1.23)               | 0.66 (0.20 - 1.15)                              | 0.866               |                |
| Inverse Simpson Index    | 1.73 (1.07 - 2.78)               | 1.6 (1.08 - 2.91)                               | 0.788               |                |
| <b>Pre-Pregnancy BMI</b> | <b>Normal or<br/>underweight</b> | <b>Overweight</b>                               | <b>Obese</b>        | <b>p-value</b> |
| Sum of abundance         | 0.17 (0.05 - 0.32)               | 0.07 (0.001 - 0.15)                             | 0.03 (0.004 - 0.15) | 0.279          |
| Richness                 | 11.5 (7 - 13)                    | 10 (4 - 14)                                     | 8 (5.5 - 12)        | 0.525          |
| Shannon Index            | 0.63 (0.17 - 1.34)               | 0.75 (0.26 - 1.07)                              | 0.71 (0.24 - 1.21)  | 0.967          |
| Inverse Simpson Index    | 1.59 (1.06 - 3.03)               | 1.87 (1.13 - 2.71)                              | 1.73 (1.11 - 2.82)  | 0.973          |

| <b>Infancy samples</b> | <b>MGE</b>         |                    |                |
|------------------------|--------------------|--------------------|----------------|
| <b>Sex</b>             | <b>Female</b>      | <b>Male</b>        | <b>p-value</b> |
| Sum of abundance       | 0.21 (0.12 - 0.79) | 0.27 (0.07 - 0.52) | 0.512          |
| Richness               | 14 (13 - 15)       | 15 (12 - 16)       | 0.694          |
| Shannon Index          | 1.23 (0.76 - 1.35) | 1.32 (0.36 - 1.62) | 0.819          |
| Inverse Simpson Index  | 2.7 (1.94 - 3.04)  | 3.04 (1.17 - 3.96) | 0.588          |
| <b>Delivery mode</b>   | <b>C-section</b>   | <b>Vaginal</b>     | <b>p-value</b> |
| Sum of abundance       | 0.36 (0.15 - 0.92) | 0.20 (0.08 - 0.61) | 0.361          |
| Richness               | 15 (12.5 - 16)     | 14 (12 - 15)       | 0.439          |

|                              |                      |                    |                |
|------------------------------|----------------------|--------------------|----------------|
| Shannon Index                | 1.32 (0.35 - 1.75)   | 1.23 (0.75 - 1.47) | 0.439          |
| Inverse Simpson Index        | 3.04 (1.16 - 4.71)   | 2.73 (1.74 - 3.65) | 0.439          |
| <b>Breastmilk percentage</b> | <b>&lt;50%</b>       | <b>≥50%</b>        | <b>p-value</b> |
| Sum of abundance             | 0.19 (0.09 - 0.44)   | 0.31 (0.08 - 0.79) | 0.455          |
| Richness                     | 14 (12.5 - 16)       | 14 (12 - 15)       | 0.746          |
| Shannon Index                | 1.21 (0.35 - 1.63)   | 1.24 (0.75 - 1.49) | 0.912          |
| Inverse Simpson Index        | 2.7 (1.15 - 3.95)    | 2.82 (1.74 - 3.67) | 1              |
| <b>Diet</b>                  | <b>No solid food</b> | <b>Solid food</b>  | <b>p-value</b> |
| Sum of abundance             | 0.38 (0.27 - 0.54)   | 0.25 (0.08 - 0.79) | 0.515          |
| Richness                     | 14.5 (13.5 - 15.3)   | 14 (13 - 16)       | 0.814          |
| Shannon Index                | 1.26 (0.67 - 1.51)   | 1.28 (0.51 - 1.54) | 0.986          |
| Inverse Simpson Index        | 2.62 (1.76 - 3.89)   | 3.01 (1.38 - 3.75) | 0.986          |

\* = p values  $\leq$  0.05

† = p values (0.05 - 0.1)
