# Supplementary material for: Perinatal risk factors for fecal antibiotic resistance gene patterns in pregnant women and their infants
Source: PubMed Central journal article supplement (PMC7302573; doi:10.1371/journal.pone.0234751), 2020-06-18
Supplement: pone.0234751.s008.pdf [file pone.0234751.s008.pdf]

| <b>Name</b>        | <b>OTU</b>    | <b>Pearson correlation</b> |
|--------------------|---------------|----------------------------|
| blaTEM             | Fusobacteria  | 0.99                       |
| ISCR1              | Lentisphaerae | 0.97                       |
| aac(3)-Xa          | Fusobacteria  | 0.98                       |
| IS26               | Fusobacteria  | 0.99                       |
| sugE               | Fusobacteria  | 0.98                       |
| Tn3                | Fusobacteria  | 1.00                       |
| Incl1_repl1        | Fusobacteria  | 1.00                       |
| IS91               | Tenericutes   | 1.00                       |
| tetB               | Fusobacteria  | 0.99                       |
| tnpA               | Fusobacteria  | 0.95                       |
| tnpA               | Fusobacteria  | 0.99                       |
| vanTG              | Lentisphaerae | 0.93                       |
| int1-a-marko       | Fusobacteria  | 0.99                       |
| intl1F165_clinical | Fusobacteria  | 0.97                       |
| sul1 NEW           | Fusobacteria  | 0.99                       |
| orf39-IS26         | Synergistetes | 0.93                       |
| aph6ic             | Synergistetes | 0.91                       |
| aadA17             | Fusobacteria  | 0.99                       |
| tetR               | Fusobacteria  | 0.99                       |
| dfra21             | Fusobacteria  | 0.99                       |
| erm(E)             | Tenericutes   | 0.99                       |
