# Supplementary material for: Perinatal risk factors for fecal antibiotic resistance gene patterns in pregnant women and their infants
Source: PubMed Central journal article supplement (PMC7302573; doi:10.1371/journal.pone.0234751), 2020-06-18
Supplement: pone.0234751.s009.pdf [file pone.0234751.s009.pdf]

| <b>Gene</b>        | <b>OTU</b>    | <b>Pearson correlation</b> |
|--------------------|---------------|----------------------------|
| blaOXY-1           | Lentisphaerae | 0.87                       |
| mefA               | Lentisphaerae | 0.89                       |
| blaTEM             | Fusobacteria  | 0.99                       |
| aac(3)-Xa          | Fusobacteria  | 0.98                       |
| IS26               | Fusobacteria  | 0.99                       |
| sugE               | Fusobacteria  | 0.98                       |
| tetA               | Fusobacteria  | 0.88                       |
| tnpA               | Fusobacteria  | 0.95                       |
| oprD               | Lentisphaerae | 0.87                       |
| sulA/fofP          | Synergistetes | 0.86                       |
| intl1F165_clinical | Fusobacteria  | 0.97                       |
| aph6ic             | Synergistetes | 0.91                       |
| erm(E)             | Tenericutes   | 0.99                       |
| mphA               | Fusobacteria  | 0.87                       |
