# Supplementary material for: Perinatal risk factors for fecal antibiotic resistance gene patterns in pregnant women and their infants
Source: PubMed Central journal article supplement (PMC7302573; doi:10.1371/journal.pone.0234751), 2020-06-18
Supplement: pone.0234751.s010.pdf [file pone.0234751.s010.pdf]

| <b>Gene</b>              | <b>OTU</b>                       | <b>Pearson correlation</b> |
|--------------------------|----------------------------------|----------------------------|
| blaCTX-M-1,3,15          | Neisseriaceae                    | 0.83                       |
| blaCTX-M-1,3,15          | Leptotrichiaceae                 | 0.99                       |
| blaTEM                   | Leuconostocaceae                 | 0.83                       |
| tetM                     | Planococcaceae                   | 0.89                       |
| tetM                     | Bacilli_unclassified             | 0.88                       |
| bla-ACT                  | Caulobacteraceae                 | 0.99                       |
| bla-ACT                  | Flavobacteriaceae                | 0.99                       |
| bla-ACT                  | Acidaminococcaceae               | 0.85                       |
| ermX                     | Actinobacteria_unclassified      | 0.87                       |
| ermX                     | Thermoanaerobacteraceae          | 0.87                       |
| ermX                     | Opitutae_unclassified            | 0.87                       |
| oprD                     | Gammaproteobacteria_unclassified | 1.00                       |
| oprD                     | Moraxellaceae                    | 0.84                       |
| oprD                     | Comamonadaceae                   | 1.00                       |
| pmrA                     | Lactobacillales_unclassified     | 0.81                       |
| ermA/ermTR               | Rhodospirillaceae                | 1.00                       |
| intI1F165_clinical       | Gammaproteobacteria_unclassified | 0.84                       |
| intI1F165_clinical       | Comamonadaceae                   | 0.84                       |
| aac(3)-iid_iii_iif_ii_ii | Gastranaerophilales_fa           | 1.00                       |
| aac(3)-iid_iii_iif_ii_ii | Rikenellaceae                    | 0.82                       |
| ere(A)                   | Staphylococcaceae                | 0.81                       |
| ere(A)                   | Eubacteriaceae                   | 0.86                       |
