# Supplementary material for: Perinatal risk factors for fecal antibiotic resistance gene patterns in pregnant women and their infants
Source: PubMed Central journal article supplement (PMC7302573; doi:10.1371/journal.pone.0234751), 2020-06-18
Supplement: pone.0234751.s011.pdf [file pone.0234751.s011.pdf]

| <b>Gene</b>        | <b>OTU</b>                    | <b>Pearson correlation</b> |
|--------------------|-------------------------------|----------------------------|
| blaOXY-1           | Victivallaceae                | 0.87                       |
| aph6ia             | Puniceicoccaceae              | 0.95                       |
| mefA               | Victivallaceae                | 0.90                       |
| blaTEM             | Corynebacteriaceae            | 0.85                       |
| blaTEM             | Fusobacteriaceae              | 0.99                       |
| czcA               | Pseudomonadaceae              | 0.80                       |
| aph3-III           | unclassified.Burkholderiales  | 0.84                       |
| aac(3)-Xa          | Corynebacteriaceae            | 0.83                       |
| aac(3)-Xa          | Fusobacteriaceae              | 0.98                       |
| IS26               | Corynebacteriaceae            | 0.85                       |
| IS26               | Fusobacteriaceae              | 0.99                       |
| sugE               | Corynebacteriaceae            | 0.84                       |
| sugE               | Fusobacteriaceae              | 0.98                       |
| IS1247             | Staphylococcaceae             | 0.82                       |
| tetA               | Fusobacteriaceae              | 0.88                       |
| tnpA               | Corynebacteriaceae            | 0.82                       |
| tnpA               | Fusobacteriaceae              | 0.95                       |
| ermX               | Pasteurellaceae               | 0.81                       |
| ermX               | Streptococcaceae              | 0.82                       |
| vanHD              | Staphylococcaceae             | 0.85                       |
| oprD               | Victivallaceae                | 0.88                       |
| mexE               | Puniceicoccaceae              | 0.99                       |
| sulA/foIP          | Synergistaceae                | 0.86                       |
| intI1F165_clinical | Corynebacteriaceae            | 0.82                       |
| intI1F165_clinical | Fusobacteriaceae              | 0.97                       |
| ISEfm1-Enteroc     | Enterococcaceae               | 0.82                       |
| aph6ic             | Synergistaceae                | 0.91                       |
| aadA7              | Bacteroidales_S24.7_group     | 0.96                       |
| tet(32)            | unclassified.Burkholderiales  | 0.84                       |
| erm(E)             | Mollicutes_RF9_fa             | 0.99                       |
| erm(E)             | Clostridiales_vadinBB60_group | 0.81                       |
| mphA               | Fusobacteriaceae              | 0.87                       |
