# Supplementary material for: Perinatal risk factors for fecal antibiotic resistance gene patterns in pregnant women and their infants
Source: PubMed Central journal article supplement (PMC7302573; doi:10.1371/journal.pone.0234751), 2020-06-18
Supplement: pone.0234751.s012.pdf [file pone.0234751.s012.pdf]

| <b>Gene</b>     | <b>OTU</b>              | <b>Pearson correlation</b> |
|-----------------|-------------------------|----------------------------|
| cfxA            | Tyzzarella              | 0.90                       |
| acrF            | Escherichia/Shigella    | 0.83                       |
| blaCTX-M-1,3,15 | Ruminococcaceae_UCG.014 | 0.99                       |
| blaCTX-M-1,3,15 | Butyricoccus            | 0.83                       |
| blaCTX-M-1,3,15 | Leptotrichia            | 0.99                       |
| blaCTX-M-1,3,15 | Neisseria               | 0.85                       |
| blaCTX-M-1,3,15 | uncultured              | 0.99                       |
| blaOXY-1        | Anaeroglobus            | 0.92                       |
| blaOXY-1        | Cellulosilyticum        | 0.97                       |
| mdth            | Escherichia/Shigella    | 0.83                       |
| pcoA            | Atopobium               | 0.98                       |
| pcoA            | Scardovia               | 0.98                       |
| blaTEM          | Weissella               | 0.83                       |
| tetM            | Rikenellaceae_RC9       | 0.89                       |
| tetM            | Rummeliibacillus        | 0.89                       |
| bla-ACT         | Desulfovibrio           | 0.98                       |
| bla-ACT         | Candidatus_Soleaferrea  | 0.99                       |
| bla-ACT         | Neorhizobium            | 0.99                       |
| bla-ACT         | Lactococcus             | 0.87                       |
| bla-ACT         | Brevundimonas           | 0.99                       |
| bla-ACT         | Phascolarctobacterium   | 0.91                       |
| bla-ACT         | Empedobacter            | 0.99                       |
| IS26            | Scardovia               | 0.91                       |
| IS26            | Atopobium               | 0.91                       |
| sugE            | Dielma                  | 0.85                       |
| sugE            | Ruminococcaceae         | 0.88                       |
| sugE            | Fusicatenibacter        | 0.82                       |
| IS200_1         | Dielma                  | 0.97                       |
| IS200_1         | Ruminococcaceae         | 0.97                       |
| IS200_1         | Fusicatenibacter        | 0.96                       |
| IS200           | Hungatella              | 0.88                       |
| IS200           | Providencia             | 1.00                       |
| oqxA            | Atopobium               | 0.96                       |
| oqxA            | Scardovia               | 0.95                       |

|                           |                         |      |
|---------------------------|-------------------------|------|
| ermX                      | Ruminococcaceae_UCG.003 | 0.87 |
| ermX                      | Gelria                  | 0.87 |
| ermX                      | Ruminococcaceae_UCG.002 | 0.83 |
| oprD                      | Acinetobacter           | 0.84 |
| ermA/ermTR                | Dialister               | 0.80 |
| tolC                      | Escherichia/Shigella    | 0.84 |
| merA-marko                | Atopobium               | 0.99 |
| merA-marko                | Scardovia               | 0.99 |
| orf39-IS26                | Atopobium               | 0.97 |
| orf39-IS26                | Scardovia               | 0.97 |
| aac(3)-iid_iii_iif_ia_iae | Gastranaerophilales_ge  | 1.00 |
| aac(3)-iid_iii_iif_ia_iae | Actinotignum            | 1.00 |
| aac(3)-iid_iii_iif_ia_iae | Varibaculum             | 0.91 |
| aac(3)-iid_iii_iif_ia_iae | Peptoniphilus           | 0.98 |
| aac(3)-iid_iii_iif_ia_iae | Negativicoccus          | 0.92 |
| aac(3)-iid_iii_iif_ia_iae | Alistipes               | 0.82 |
| aac(3)-iid_iii_iif_ia_iae | Peptostreptococcus      | 1.00 |
| emrD                      | Cellulosilyticum        | 0.91 |
| emrD                      | Anaeroglobus            | 0.85 |
| ere(A)                    | Ruminiclostridium_9     | 0.92 |
| ere(A)                    | Staphylococcus          | 0.81 |
| ere(A)                    | Eubacterium             | 0.85 |
| mdtE/yhiU                 | Escherichia/Shigella    | 0.86 |
| acrB                      | Escherichia/Shigella    | 0.87 |

---
