# Supplementary material for: Perinatal risk factors for fecal antibiotic resistance gene patterns in pregnant women and their infants
Source: PubMed Central journal article supplement (PMC7302573; doi:10.1371/journal.pone.0234751), 2020-06-18
Supplement: pone.0234751.s013.pdf [file pone.0234751.s013.pdf]

| <b>Gene</b> | <b>OTU</b>        | <b>Pearson correlation</b> |
|-------------|-------------------|----------------------------|
| blaOXY-1    | Victivallis       | 0.87                       |
| blaOXY-1    | Alloprevotella    | 0.92                       |
| blaMIR      | Coprococcus_2     | 0.82                       |
| aph6ia      | Pseudobutyrvibrio | 0.95                       |
| mefA        | Victivallis       | 0.89                       |
| mefA        | Alloprevotella    | 0.96                       |
| blaTEM      | Mobiluncus        | 0.99                       |
| blaTEM      | Lawsonella        | 0.89                       |
| blaTEM      | Moryella          | 0.99                       |
| blaTEM      | Porphyromonas     | 0.94                       |
| blaTEM      | Fastidiosipila    | 0.99                       |
| blaTEM      | Fusobacterium     | 0.99                       |
| blaTEM      | Ezakiella         | 0.97                       |
| blaTEM      | Corynebacterium_1 | 0.99                       |
| blaTEM      | Prevotella_6      | 0.99                       |
| blaTEM      | Hungatella        | 0.90                       |
| blaTEM      | Tyzzarella_4      | 0.98                       |
| blaTEM      | Anaerococcus      | 0.88                       |
| blaTEM      | Parvimonas        | 0.99                       |
| blaTEM      | uncultured.9      | 0.99                       |
| blaTEM      | Finegoldia        | 0.99                       |
| blaTEM      | Peptoniphilus     | 0.99                       |
| blaTEM      | Jonquetella       | 0.99                       |
| blaTEM      | Prevotella        | 0.91                       |
| blaTEM      | Murdochiella      | 0.93                       |
| intl3       | Chroococcidiopsis | 0.83                       |
| czcA        | Chroococcidiopsis | 0.94                       |
| czcA        | Pseudomonas       | 0.80                       |
| aac(3)-Xa   | Tyzzarella_4      | 0.96                       |
| aac(3)-Xa   | Fastidiosipila    | 0.98                       |
| aac(3)-Xa   | Fusobacterium     | 0.98                       |
| aac(3)-Xa   | Anaerococcus      | 0.87                       |
| aac(3)-Xa   | Mobiluncus        | 0.98                       |
| aac(3)-Xa   | Parvimonas        | 0.98                       |

|           |                   |      |
|-----------|-------------------|------|
| aac(3)-Xa | Jonquetella       | 0.98 |
| aac(3)-Xa | Ezakiella         | 0.95 |
| aac(3)-Xa | Lawsonella        | 0.88 |
| aac(3)-Xa | Peptoniphilus     | 0.97 |
| aac(3)-Xa | Finegoldia        | 0.98 |
| aac(3)-Xa | Moryella          | 0.98 |
| aac(3)-Xa | Murdochiella      | 0.92 |
| aac(3)-Xa | Hungatella        | 0.91 |
| aac(3)-Xa | Porphyromonas     | 0.92 |
| aac(3)-Xa | uncultured.9      | 0.98 |
| aac(3)-Xa | Prevotella        | 0.94 |
| aac(3)-Xa | Corynebacterium_1 | 0.98 |
| aac(3)-Xa | Prevotella_6      | 0.98 |
| IS26      | Anaerococcus      | 0.88 |
| IS26      | Prevotella_6      | 0.99 |
| IS26      | Fastidiosipila    | 0.99 |
| IS26      | Parvimonas        | 0.99 |
| IS26      | Fusobacterium     | 0.99 |
| IS26      | Murdochiella      | 0.95 |
| IS26      | Tyzzera_4         | 0.99 |
| IS26      | Moryella          | 0.99 |
| IS26      | Corynebacterium_1 | 0.99 |
| IS26      | Ezakiella         | 0.97 |
| IS26      | Prevotella        | 0.93 |
| IS26      | Peptoniphilus     | 0.99 |
| IS26      | Porphyromonas     | 0.94 |
| IS26      | Jonquetella       | 0.99 |
| IS26      | Mobiluncus        | 0.99 |
| IS26      | Hungatella        | 0.94 |
| IS26      | Finegoldia        | 0.99 |
| IS26      | Lawsonella        | 0.89 |
| IS26      | uncultured.9      | 0.99 |
| sugE      | Fastidiosipila    | 0.98 |
| sugE      | Moryella          | 0.98 |
| sugE      | Anaerococcus      | 0.88 |
| sugE      | Tyzzera_4         | 0.97 |
| sugE      | Jonquetella       | 0.98 |
| sugE      | Mobiluncus        | 0.98 |
| sugE      | Finegoldia        | 0.98 |

|        |                         |      |
|--------|-------------------------|------|
| sugE   | Fusobacterium           | 0.98 |
| sugE   | Parvimonas              | 0.98 |
| sugE   | Murdochiella            | 0.92 |
| sugE   | Prevotella              | 0.90 |
| sugE   | Peptoniphilus           | 0.98 |
| sugE   | Ezakiella               | 0.96 |
| sugE   | Prevotella_6            | 0.98 |
| sugE   | Hungatella              | 0.89 |
| sugE   | Porphyromonas           | 0.93 |
| sugE   | Lawsonella              | 0.89 |
| sugE   | Corynebacterium_1       | 0.98 |
| IS1247 | Staphylococcus          | 0.81 |
| IS1247 | Faecalicoccus           | 0.95 |
| IS1247 | Mogibacterium           | 0.87 |
| aadE   | Ruminococcaceae_UCG.011 | 0.84 |
| tetA   | Finegoldia              | 0.88 |
| tetA   | Jonquetella             | 0.88 |
| tetA   | Prevotella              | 0.81 |
| tetA   | Murdochiella            | 0.82 |
| tetA   | Tyzzarella_4            | 0.87 |
| tetA   | Fusobacterium           | 0.88 |
| tetA   | Fastidiosipila          | 0.88 |
| tetA   | Corynebacterium_1       | 0.88 |
| tetA   | Prevotella_6            | 0.88 |
| tetA   | Mobiluncus              | 0.88 |
| tetA   | Porphyromonas           | 0.84 |
| tetA   | Parvimonas              | 0.88 |
| tetA   | Ezakiella               | 0.88 |
| tetA   | Peptoniphilus           | 0.88 |
| tetA   | Moryella                | 0.88 |
| tnpA   | Corynebacterium_1       | 0.95 |
| tnpA   | Moryella                | 0.95 |
| tnpA   | Jonquetella             | 0.95 |
| tnpA   | Fusobacterium           | 0.95 |
| tnpA   | Porphyromonas           | 0.91 |
| tnpA   | Prevotella_6            | 0.94 |
| tnpA   | Anaerococcus            | 0.84 |
| tnpA   | Tyzzarella_4            | 0.95 |
| tnpA   | Peptoniphilus           | 0.94 |

|                    |                   |      |
|--------------------|-------------------|------|
| tnpA               | Ezakiella         | 0.93 |
| tnpA               | Mobiluncus        | 0.95 |
| tnpA               | Prevotella        | 0.91 |
| tnpA               | Finnegoldia       | 0.95 |
| tnpA               | Parvimonas        | 0.95 |
| tnpA               | Fastidiosipila    | 0.95 |
| tnpA               | Hungatella        | 0.94 |
| tnpA               | Murdochiella      | 0.94 |
| tnpA               | Lawsonella        | 0.85 |
| ermX               | Klebsiella        | 0.98 |
| ermX               | Paeniclostridium  | 1.00 |
| ermX               | Haemophilus       | 0.82 |
| ermX               | Alloscardovia     | 0.81 |
| ermX               | Lactococcus       | 0.99 |
| ermX               | Aggregatibacter   | 1.00 |
| vanHD              | Faecalicoccus     | 0.98 |
| vanHD              | Staphylococcus    | 0.84 |
| vanHD              | Mogibacterium     | 0.89 |
| oprD               | Victivallis       | 0.87 |
| oprD               | Alloprevotella    | 0.93 |
| oprD               | uncultured_ge     | 0.91 |
| mexE               | Pseudobutyrvibrio | 0.99 |
| sulA/foIP          | Dysgonomonas      | 0.90 |
| sulA/foIP          | Cloacibacillus    | 0.81 |
| sulA/foIP          | Pyramidobacter    | 0.90 |
| ermA/ermTR         | Coprococcus_2     | 0.82 |
| intI1F165_clinical | Peptoniphilus     | 0.96 |
| intI1F165_clinical | Fastidiosipila    | 0.97 |
| intI1F165_clinical | Tyzzarella_4      | 0.95 |
| intI1F165_clinical | Jonquetella       | 0.97 |
| intI1F165_clinical | Fusobacterium     | 0.97 |
| intI1F165_clinical | Prevotella        | 0.88 |
| intI1F165_clinical | Corynebacterium_1 | 0.97 |
| intI1F165_clinical | Hungatella        | 0.90 |
| intI1F165_clinical | Anaerococcus      | 0.86 |
| intI1F165_clinical | Ezakiella         | 0.94 |
| intI1F165_clinical | Mobiluncus        | 0.97 |
| intI1F165_clinical | Porphyromonas     | 0.91 |
| intI1F165_clinical | Parvimonas        | 0.97 |

|                    |                         |      |
|--------------------|-------------------------|------|
| intI1F165_clinical | Murdochiella            | 0.91 |
| intI1F165_clinical | Moryella                | 0.97 |
| intI1F165_clinical | Finegoldia              | 0.97 |
| intI1F165_clinical | Lawsonella              | 0.87 |
| intI1F165_clinical | Prevotella_6            | 0.96 |
| ISEfm1-Entero      | Enterococcus            | 0.85 |
| aph6ic             | Cloacibacillus          | 0.86 |
| aph6ic             | Ruminiclostridium_1     | 0.87 |
| aph6ic             | Dysgonomonas            | 0.96 |
| aph6ic             | Pyramidobacter          | 0.96 |
| aac(6)-im          | Olsenella               | 0.86 |
| aac(6)-im          | Mitsuokella             | 0.93 |
| aadA7              | Bacteroidales_S24.7     | 0.96 |
| aadA7              | Ruminococcaceae_UCG.008 | 0.86 |
| tetG_F             | Faecalicoccus           | 0.85 |
| erm(E)             | Peptococcus             | 0.98 |
| erm(E)             | Enterorhabdus           | 1.00 |
| erm(E)             | NB1.n_ge                | 0.98 |
| erm(E)             | Anaerotruncus           | 0.95 |
| erm(E)             | Mollicutes_RF9_ge       | 0.99 |
| erm(E)             | Clostridiales_vadinBB60 | 0.81 |
| erm(E)             | Holdemanella            | 0.84 |
| mphA               | Prevotella              | 0.93 |
| mphA               | Prevotella_6            | 0.89 |
| mphA               | Moryella                | 0.87 |
| mphA               | Fusobacterium           | 0.87 |
| mphA               | Tyzzera_4               | 0.85 |
| mphA               | Porphyromonas           | 0.82 |
| mphA               | Jonquetella             | 0.87 |
| mphA               | Murdochiella            | 0.80 |
| mphA               | Corynebacterium_1       | 0.87 |
| mphA               | Finegoldia              | 0.87 |
| mphA               | Mobiluncus              | 0.87 |
| mphA               | Ezakiella               | 0.84 |
| mphA               | Parvimonas              | 0.87 |
| mphA               | Fastidiosipila          | 0.87 |
| mphA               | Peptoniphilus           | 0.86 |

---
